# Supplementary material
Source: publisher site journal article supplement (https://www.dovepress.com/article/supplementary_file/538389/Supplementary%20material_1.docx)
Supplement: Supplementary file 1 [file Supplementary%20material_1.docx]

Supplementary Table 1 Main themes and categories of the patient personas

|  | Themes | Sub-Themes |
| --- | --- | --- |
| Patient personas | Motivation | Avoid medical risks |
| Rely on medical authority |
| Reduce trouble |
| Question medical authority |
| Willingness | Actively engage |
| Passive acceptance with occasional doubts |
| Silent or perfunctory responses |
| Desire to assert control |
| Decision-making factors | Cognitive ability |
| Psychological trait |
| Social support |
| Decision-making balance | Rational risk-benefit assessment |
| Accept the"default option" from providers |
| Low sensitivity to medical risks |
| Overestimate personal judgment |
| Effect evaluation | Highly effective |
| Partially effective |
| Limited effect |
| Needs optimization |


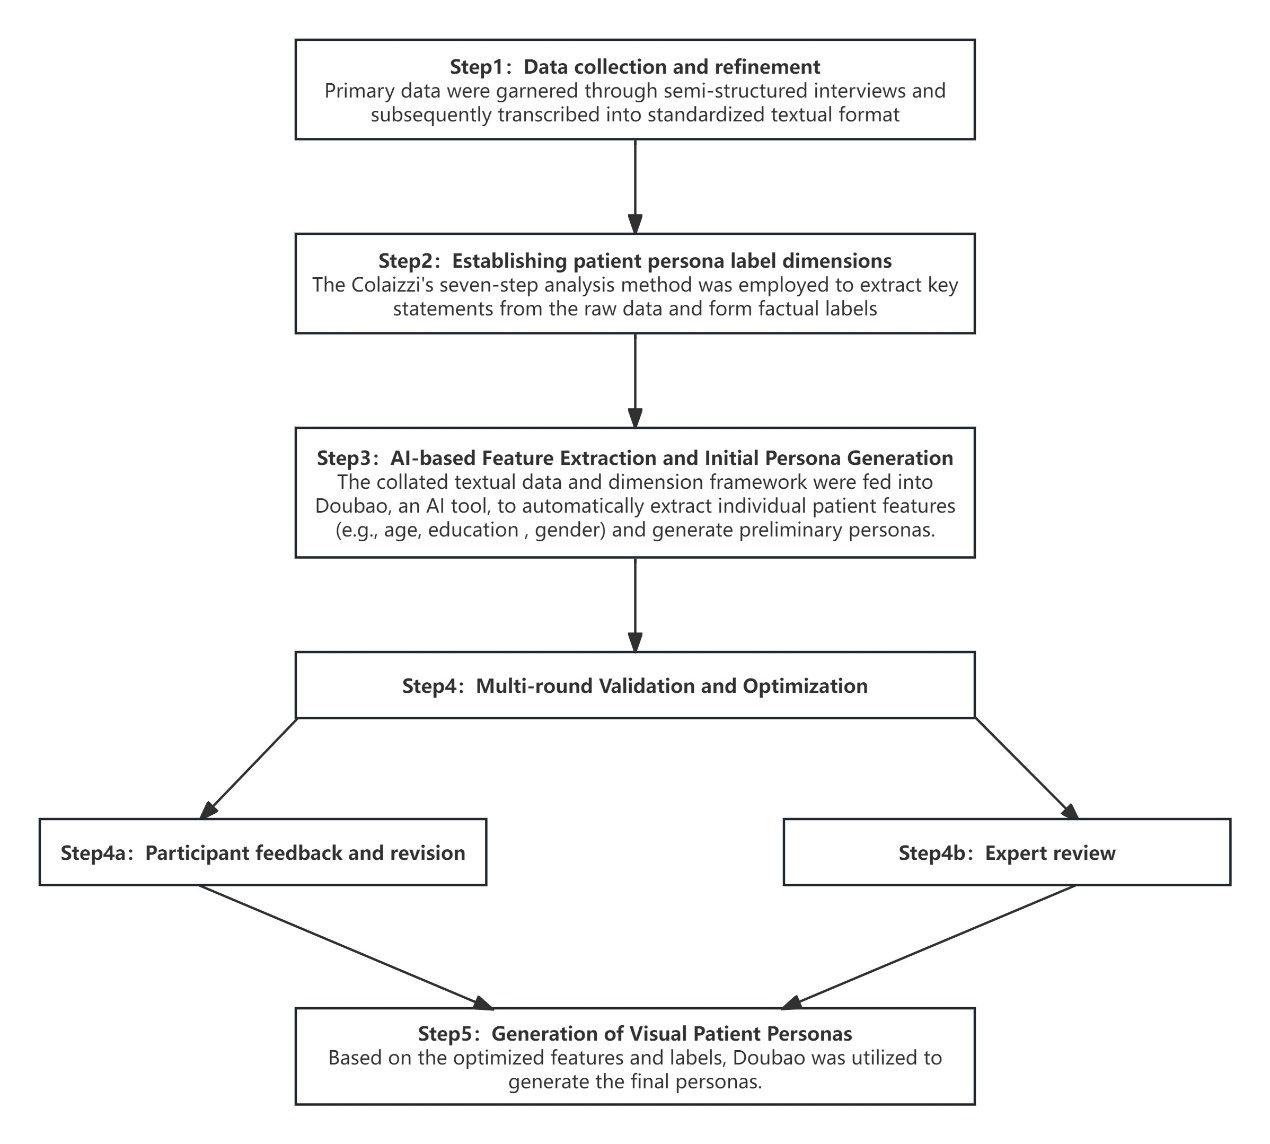


Supplementary Figure.1 An example of the process of development of the patient personas
